# Supplementary material
Source: publisher site journal article supplement (https://www.dovepress.com/article/291172)
Supplement: Supplementary file 1 [file get_supplementary_file.php]

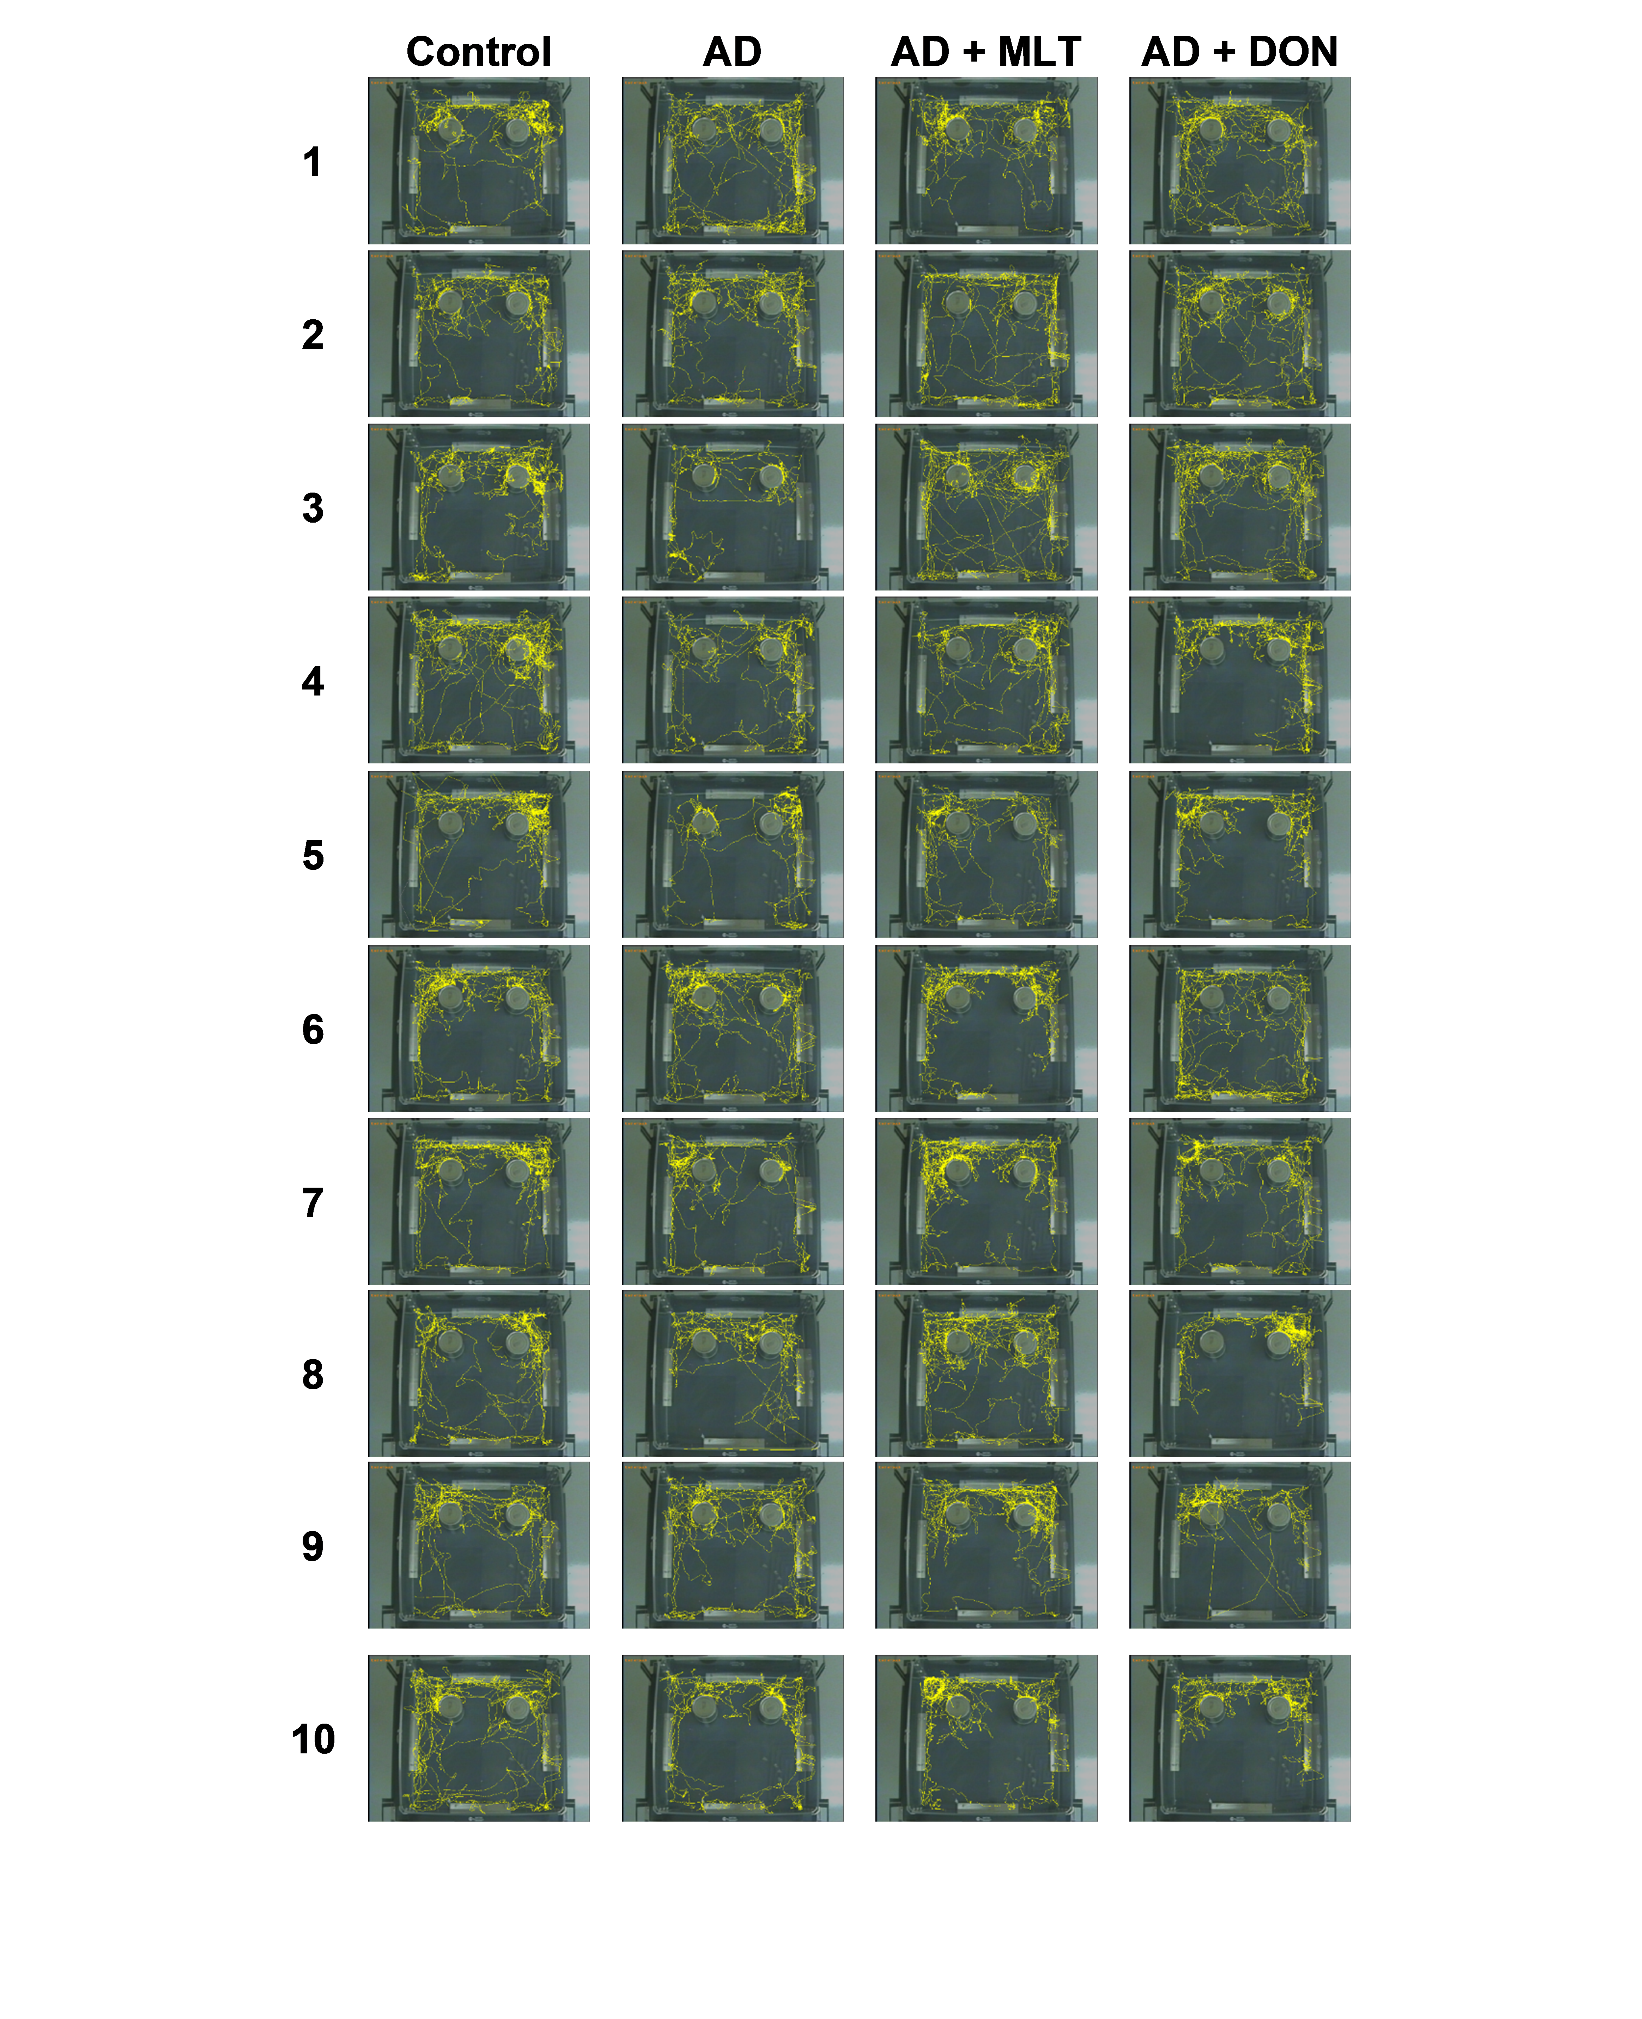


**Supplementary Figure S1: Tracked path of each mouse in the familiarization phase of the OLT.** **MLT:** Melatonin**; DON:** donepezil.


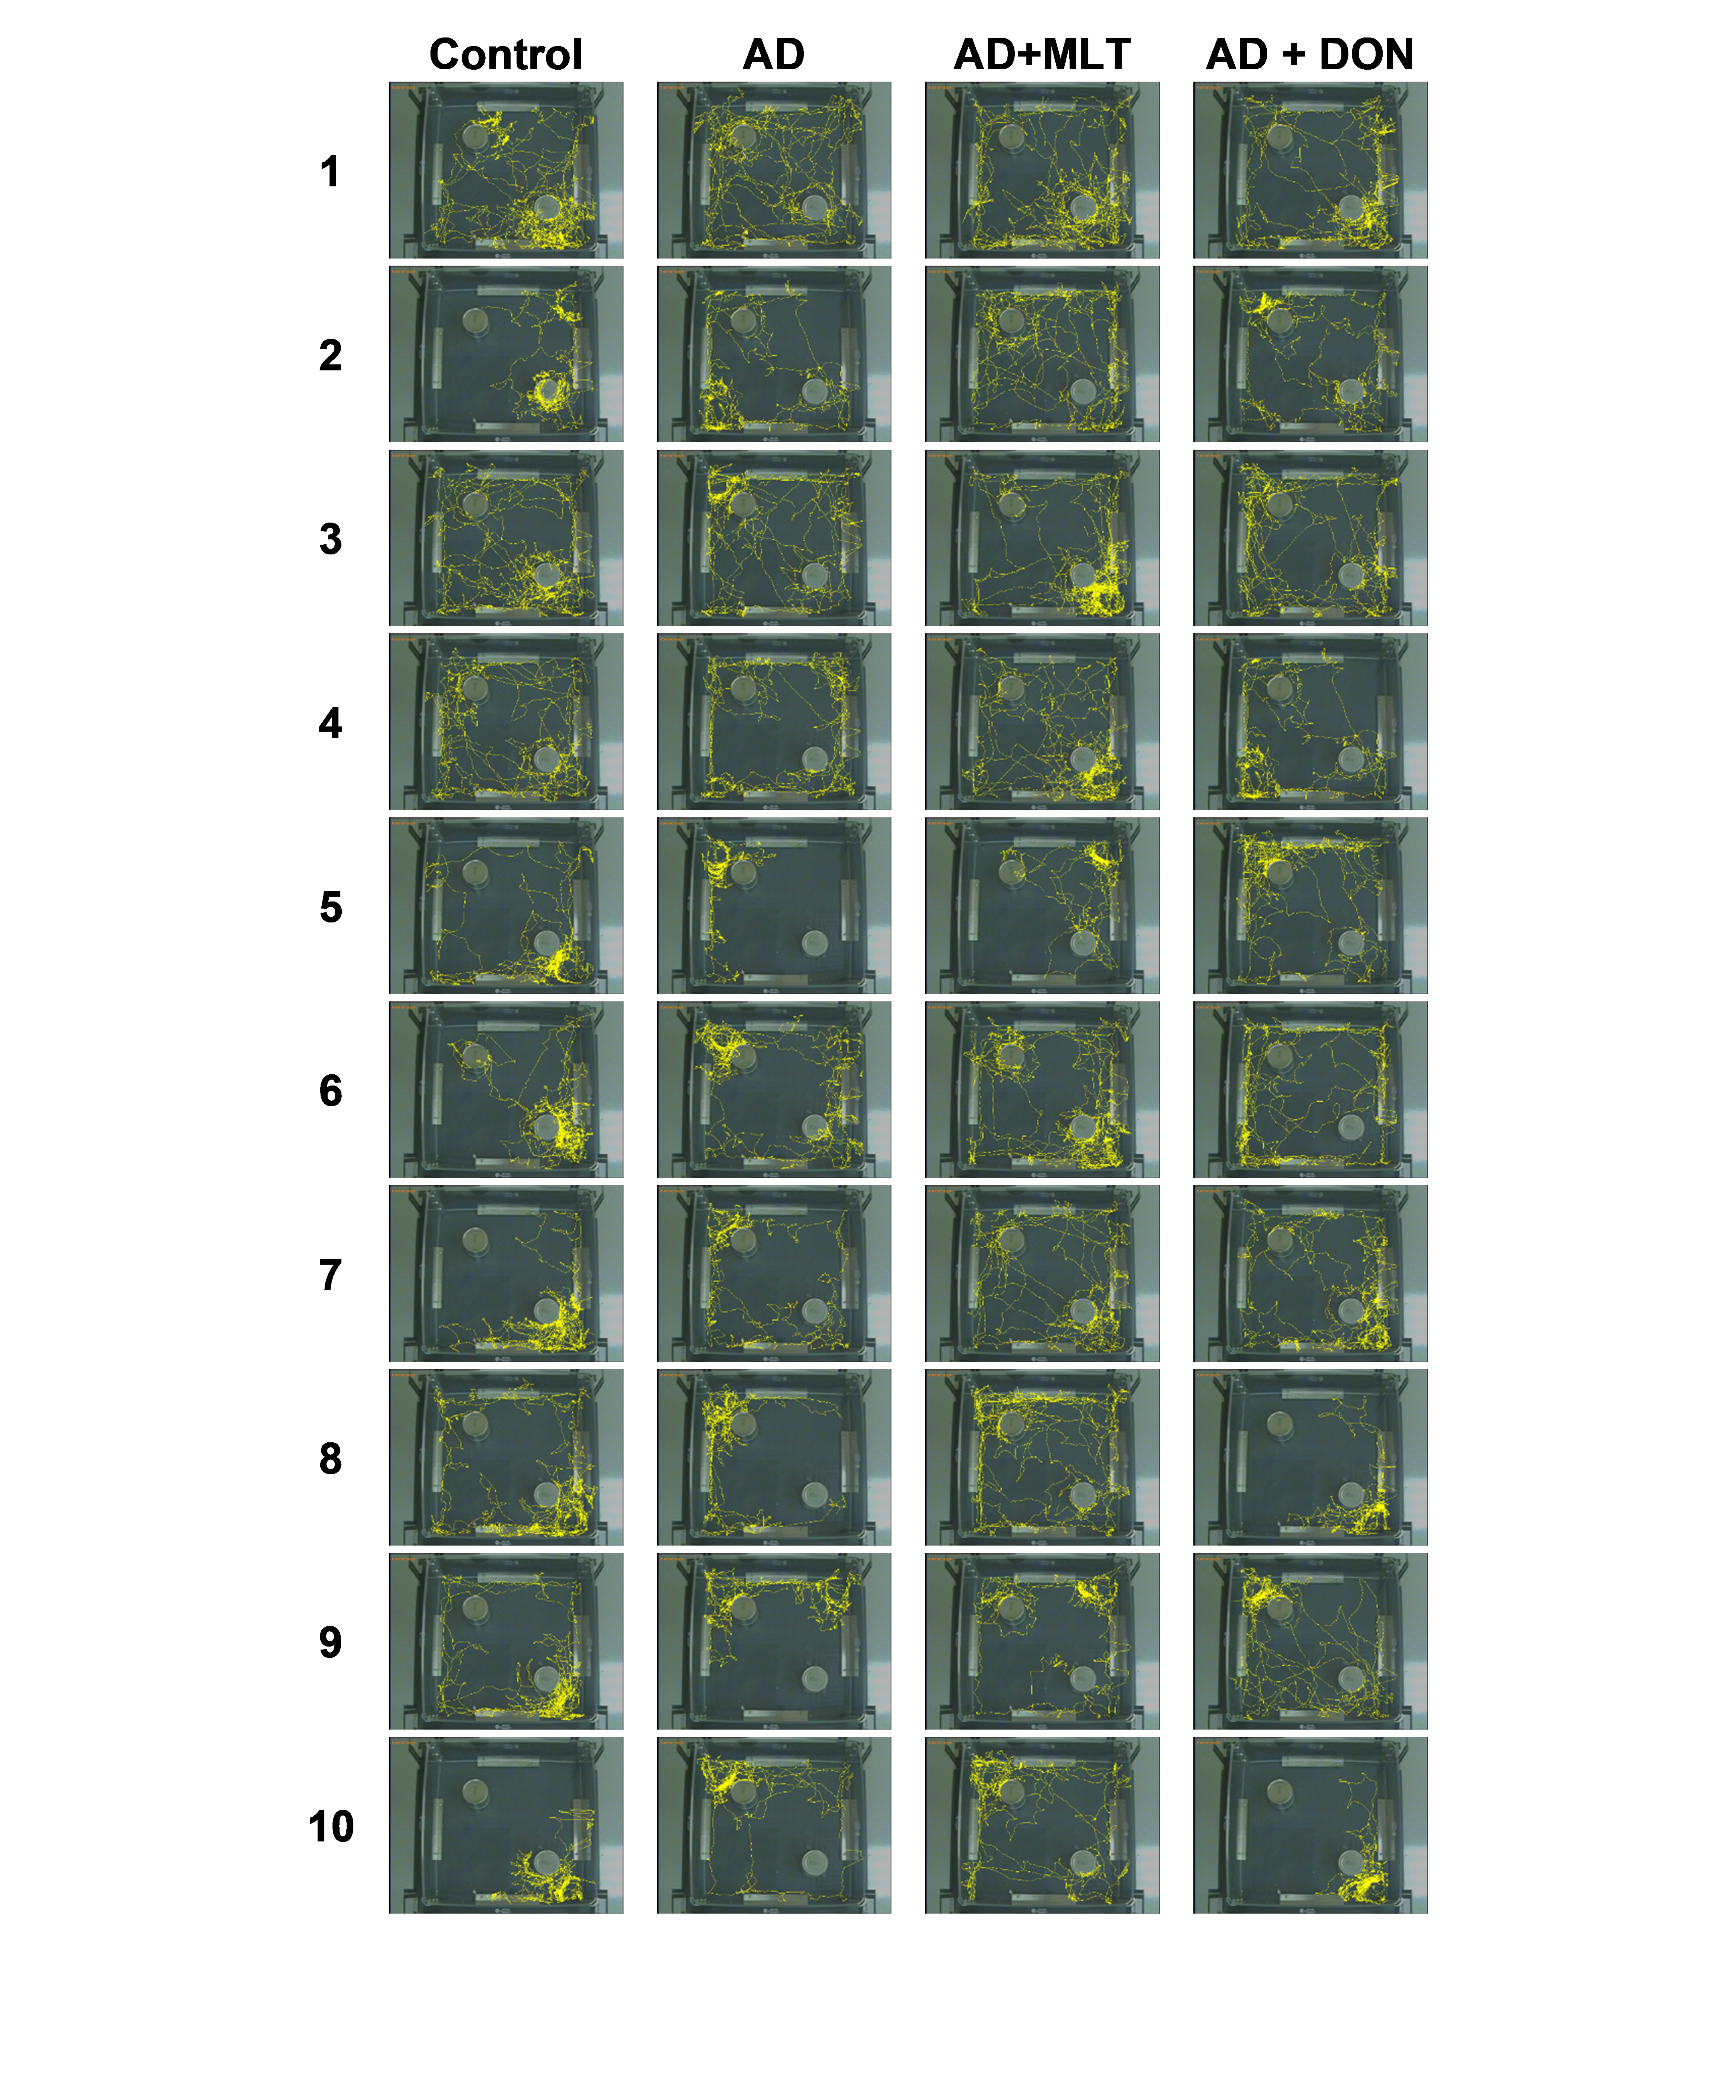


**Supplementary Figure S2: Tracked path of each mouse in the test phase of the OLT. MLT:** Melatonin**; DON:** donepezil
